# Supplementary material for: High Power Electromagnetic Waves Exposure of Healthy and Tumor Bearing Mice: Assessment of Effects on Mice Growth, Behavior, Tumor Growth, and Vessel Permeabilization
Source: MDPI journal article supplement (doi:10.3390/ijms22168516), 2021-08-07
Supplement: s1 [file s1]

Please refer to [10.5281/zenodo.5092170](https://doi.org/10.5281/zenodo.5092170)
